# Supplementary material for: ImmunoAIzer: A Deep Learning-Based Computational Framework to Characterize Cell Distribution and Gene Mutation in Tumor Microenvironment
Source: MDPI journal article supplement (doi:10.3390/cancers13071659), 2021-04-01
Supplement: s1 [file s1]

Supplementary

# ImmunoAizer: A Deep Learning-Based Computational Framework to Characterize Cell Distribution and Gene Mutation in Tumor Microenvironment

Chang Bian, Yu Wang, Zhihao Lu, Yu An, Hanfan Wang, Lingxin Kong, Yang Du\* and Jie Tian\*

**Table S1.** Scanned image sizes of the four H&E Whole Slide Images (WSIs) for cell quantification experiment.

| Image Information | WSI1              | WSI2              | WSI3              | WSI4              |
|-------------------|-------------------|-------------------|-------------------|-------------------|
| Image Size        | 13.43mm × 19.42mm | 15.83mm × 18.34mm | 19.18mm × 25.54mm | 19.66mm × 26.26mm |
| Resolution        | 0.25µm/pixel      | 0.25µm/pixel      | 0.25µm/pixel      | 0.25µm/pixel      |
| Size in Pixels    | 53760 × 77760     | 63363 × 73440     | 76800 × 102240    | 78720 × 105120    |

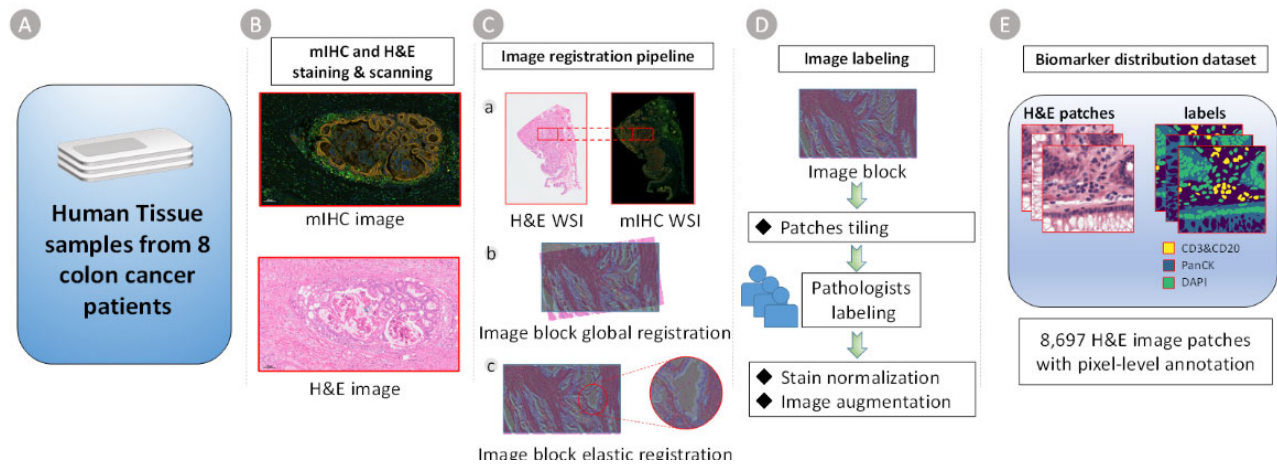

**Figure S1.** Construction pipeline of the dataset with H&E images and corresponding pixel-level labels. (A) Human tissue samples were acquired from eight colon cancer patients. (B) Tissue samples were stained and scanned to acquire H&E and mIHC images. (C) A series of registration procedures, including image block matching, global registration, and elastic registration were conducted to ensure pixel-wise registration of the mIHC images and H&E images for annotation. (D) Registered image blocks were tiled into 512 × 512-pixel patches and sent to pathologists for annotation, and then we conducted stain normalization and image augmentation. (E) A cellular biomarker distribution dataset, including H&E image patches and corresponding biomarker distribution label masks, was constructed.

### Distribution of Most Frequently Mutated Genes

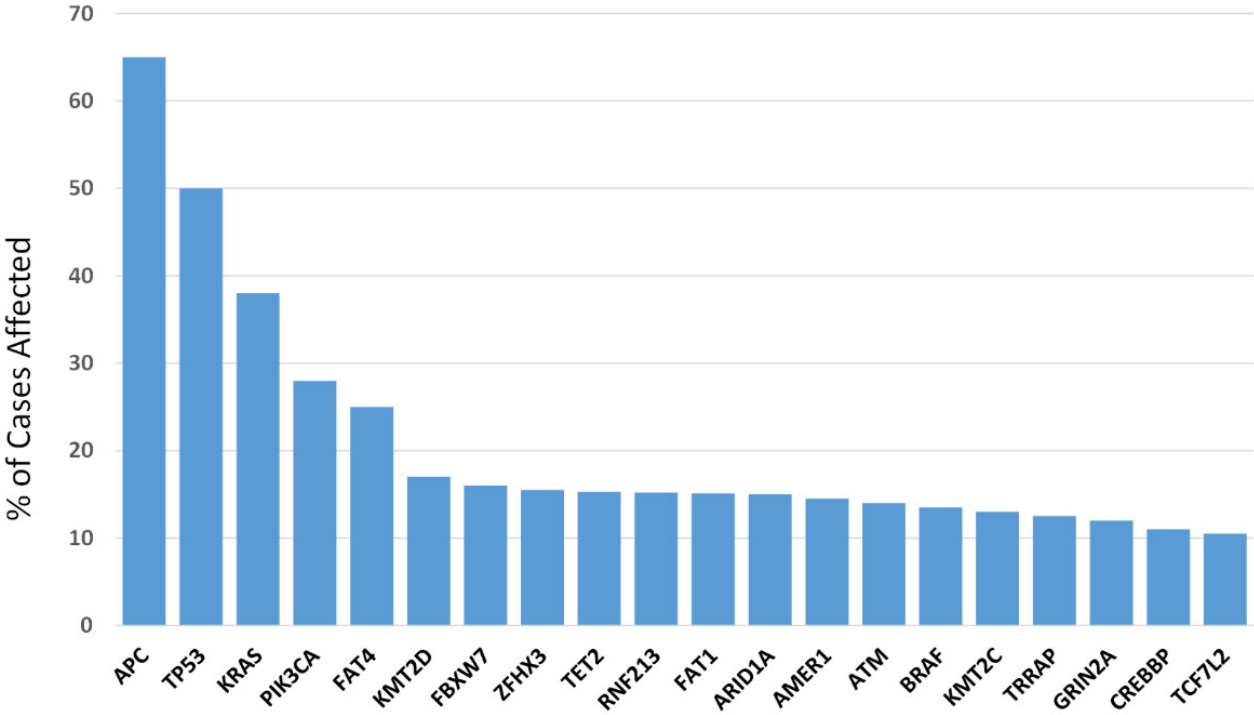

Figure S2. Distribution of most frequently mutated genes of the 446 cases from TCGA COAD project.

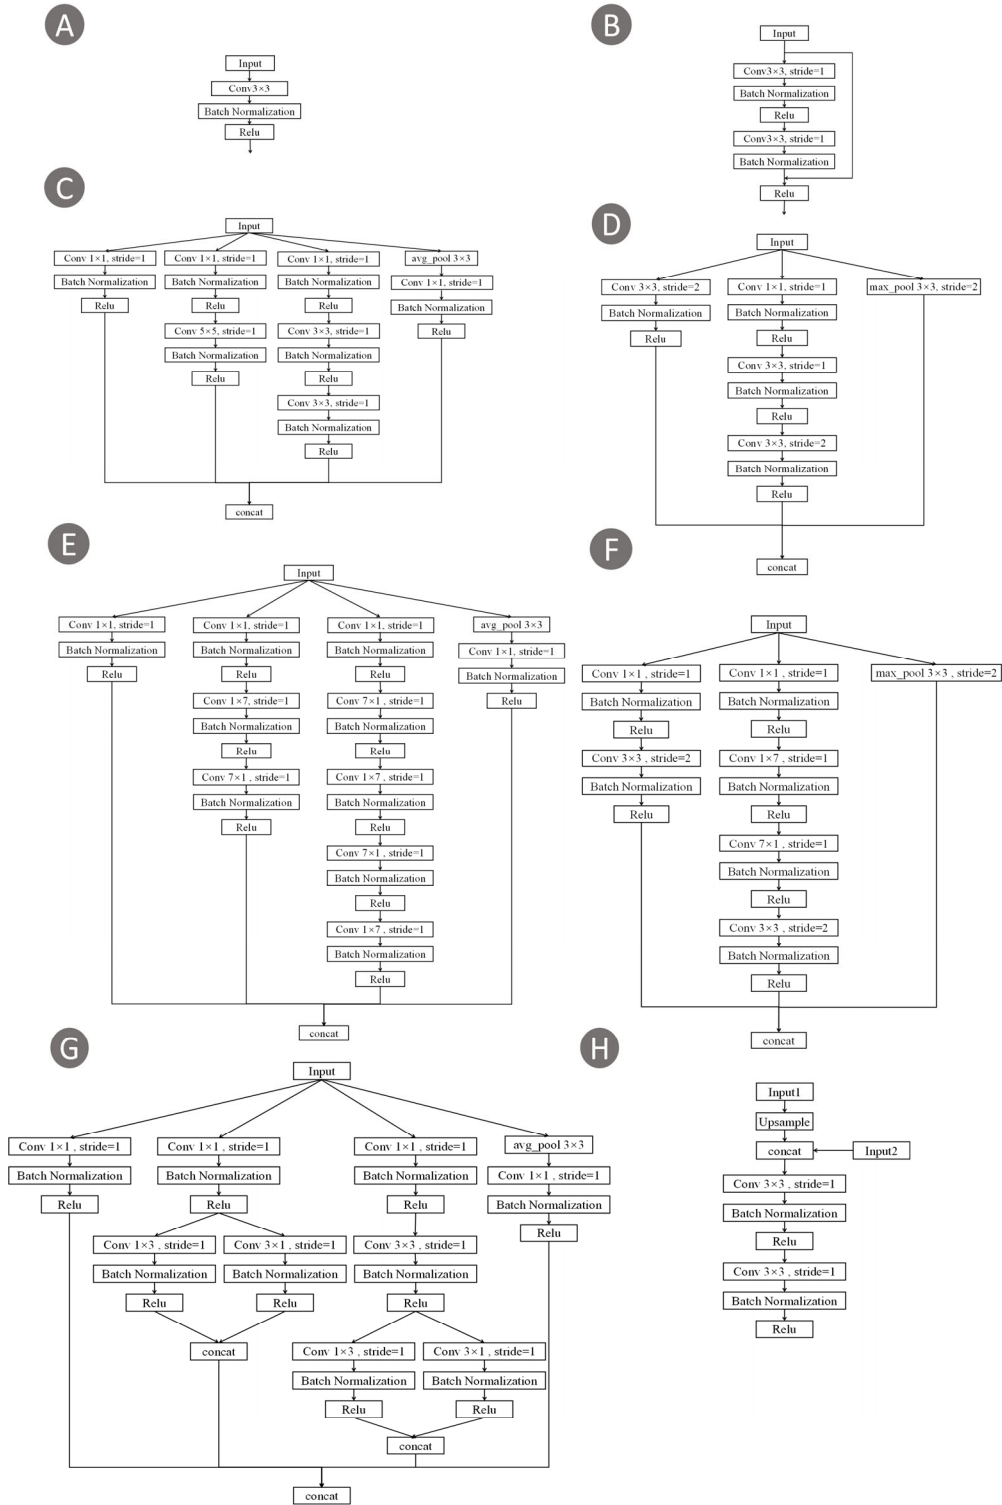

**Figure S3.** Internal structure of CBPDN blocks. (A) Convolutional block structure. (B) Residual block structure. (C) Inception A structure. (D) Inception B structure. (E) Inception C structure. (F) Inception D structure. (G) Inception E structure. (H) Upsample block structure.

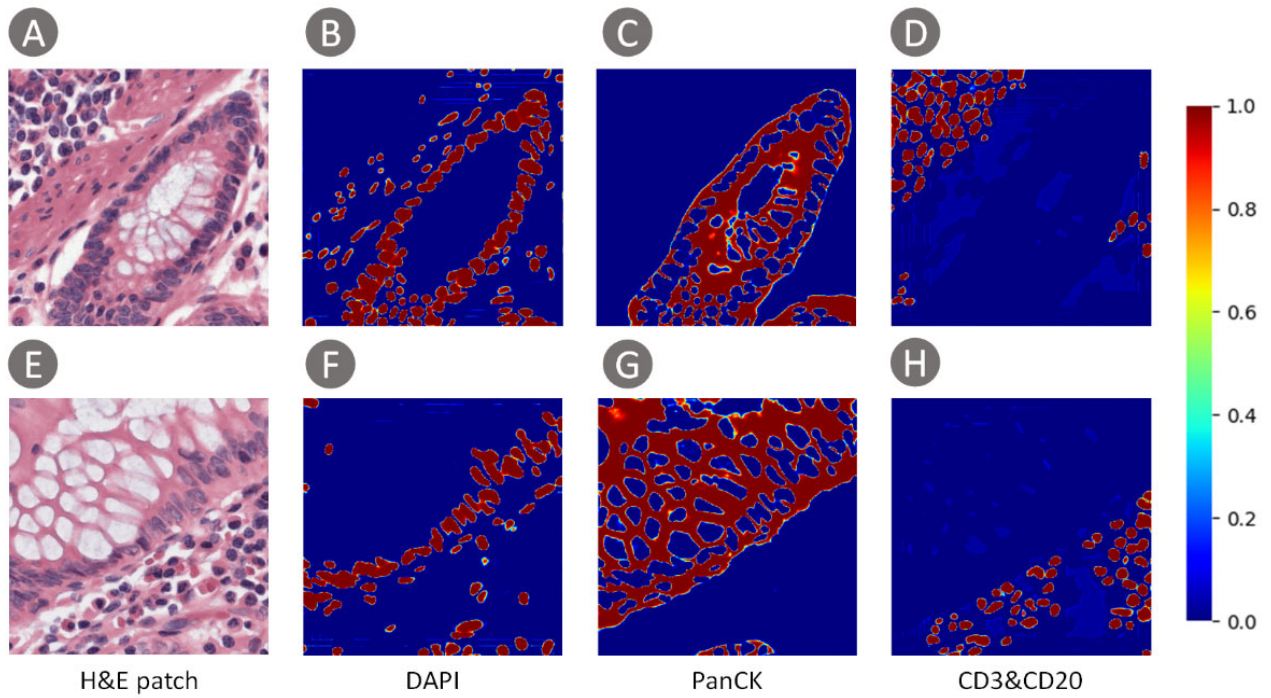

**Figure S4.** Feature maps obtained after softmax operation of CBDPN. The intensity of the color bar indicates the probability of the corresponding pixel being predicted. (A)&(E) H&E image patch, (B)&(F) DAPI, (C)&(G) PanCK, (D)&(H) CD3 and CD20.
